# Supplementary material
Source: publisher site journal article supplement (https://www.dovepress.com/article/326147)
Supplement: Supplementary file 1 [file get_supplementary_file.php]

# E-LEARNING THROUGH EDUCATORS PERSPECTIVE

---

\* Required

## E-learning in Medical Education

E-learning is the use of web based technology to deliver formalized teaching. With increasing internet penetration, towering number of smart phone users and rising web footprints in India, E-learning as a mode of education has been experiencing a steady growth over the past decade. Medical education in India though has undergone small drifts and evolution in pedagogy over the years, it has been mostly immune to e-learning. During Pandemic, we experienced an exponential application of E-learning pedagogy in order to ensure continuous and effective delivery of medical education and it has become imperative to understand the intricacies, advantages and the challenges posed by E-learning to both the educators and the learners in field of education.

1. Are you willing to Participate in the study? \*

*Mark only one oval.*

Yes

No

2. Have you had any previous experience of E-learning? \*

*Mark only one oval.*

Yes

No

## 3. Grade your experience of teaching in E-learning \*

Mark only one oval.

|               |                       |                       |                       |                       |                       |                       |                     |
|---------------|-----------------------|-----------------------|-----------------------|-----------------------|-----------------------|-----------------------|---------------------|
|               | 0                     | 1                     | 2                     | 3                     | 4                     | 5                     |                     |
| No experience | <input type="radio"/> | Highly satisfactory |

## 4. What skills do you think are essential for teaching effectively in E-learning \*

\*Multiple Responses

Check all that apply.

- Communication skills
- Technological skills
- Time Management skills
- Assessment and Evaluation skills

Other:  \_\_\_\_\_

## 5. Grade the following skills individually on the basis of their effectiveness in e-learning \*

0=not required ; 5= must required

*Mark only one oval per row.*

|                                  | 0                     | 1                     | 2                     | 3                     | 4                     | 5                     |
|----------------------------------|-----------------------|-----------------------|-----------------------|-----------------------|-----------------------|-----------------------|
| Communication skills             | <input type="radio"/> |
| Technological skills             | <input type="radio"/> |
| Time Management skills           | <input type="radio"/> |
| Assessment and Evaluation skills | <input type="radio"/> |

## 6. Rate your skills in the following fields \*

1=low skilled ; 5= highly skilled

*Mark only one oval per row.*

|                                  | 1                     | 2                     | 3                     | 4                     | 5                     |
|----------------------------------|-----------------------|-----------------------|-----------------------|-----------------------|-----------------------|
| Communication skills             | <input type="radio"/> |
| Technological skills             | <input type="radio"/> |
| Time Management skills           | <input type="radio"/> |
| Assessment and Evaluation skills | <input type="radio"/> |

## 7. Kindly grade your overall proficiency in E-learning \*

Mark only one oval.

|           |                       |                       |                       |                       |                       |             |
|-----------|-----------------------|-----------------------|-----------------------|-----------------------|-----------------------|-------------|
|           | 1                     | 2                     | 3                     | 4                     | 5                     |             |
| Very Weak | <input type="radio"/> | Very Strong |

## 8. Which of the following methods were used by you to achieve the present skills set in E-learning \*

\*Multiple Responses

Check all that apply.

Educational Programme

Peer to peer

Self

Other:  \_\_\_\_\_

## 9. Which among the following methods would you prefer for improving your skills in E-learning \*

\*Multiple Responses

Check all that apply.

Educational Programme

Peer to peer

Self

Other:  \_\_\_\_\_

## GRADE THE FOLLOWING

## 10. Conventional Classroom \*

Mark only one oval.

|                  |                       |                       |                       |                       |                       |                 |
|------------------|-----------------------|-----------------------|-----------------------|-----------------------|-----------------------|-----------------|
|                  | 1                     | 2                     | 3                     | 4                     | 5                     |                 |
| Least convenient | <input type="radio"/> | Most convenient |

## 11. Online Mode \*

Mark only one oval.

|                  |                       |                       |                       |                       |                       |                 |
|------------------|-----------------------|-----------------------|-----------------------|-----------------------|-----------------------|-----------------|
|                  | 1                     | 2                     | 3                     | 4                     | 5                     |                 |
| Least convenient | <input type="radio"/> | Most convenient |

12. Which of the following methods would you like to have or have used in E-learning \*

*Check all that apply.*

- Live streaming AV with PPT  
 Recorded AV with PPT  
 Live AV only  
 Recorded AV  
 PDF Or PPT only

13. Grade the following methods of teaching according to your preference based on their utility in E-learning \*

\*1=Least Preferred 5=Most Preferred

*Mark only one oval per row.*

|                            | 1                     | 2                     | 3                     | 4                     | 5                     |
|----------------------------|-----------------------|-----------------------|-----------------------|-----------------------|-----------------------|
| Live streaming AV with PPT | <input type="radio"/> |
| Recorded AV with PPT       | <input type="radio"/> |
| Live AV only               | <input type="radio"/> |
| Recorded AV                | <input type="radio"/> |
| PDF or PPT only            | <input type="radio"/> |

14. Which of the following online platforms are you aware about \*

*Check all that apply.*

- Google Meet
- Zoom
- Loom
- Webex
- Not aware

15. Which of the following online platforms do you use for E-learning \*

*Check all that apply.*

- Google Meet
- Zoom
- Loom
- Webex
- YouTube
- Not involved in E-learning sessions yet

Other:  \_\_\_\_\_

16. According to you, what should be an appropriate duration of a lecture in e-learning \*

*Mark only one oval.*

- 30 min
- 30 min - 45 min
- 45 min- 1 hr
- Other: \_\_\_\_\_

17. Which time slot will be convenient to you for live E-learning classes \*

*Mark only one oval.*

- 8 am-10 am (Morning)
- 10 am-12 pm (Forenoon)
- 2 pm-4 pm (Afternoon)
- Other: \_\_\_\_\_



18. How many participants will you be comfortable with during single lecture of E-learning \*

*Mark only one oval.*

- 1-25
- 26-50
- 51-75
- 76-100
- Other: \_\_\_\_\_

19. Have you been conducting assessments following E-learning sessions \*

*Mark only one oval.*

- Yes
- No *Skip to question 25*
- Not involved in E-learning sessions yet *Skip to question 25*

20. What are the methods used by you for evaluating the students in E-learning \*

*Mark only one oval.*

- Examination based only    *Skip to question 21*
- Assignment/Activity based only    *Skip to question 22*
- Both    *Skip to question 23*

21. Which of the following examination models do you use to evaluate the students in E-learning \*

\*Multiple Responses

*Check all that apply.*

- Subjective (Q & A)
- Objective (MCQ)
- Viva

Other:  \_\_\_\_\_

*Skip to question 25*

22. Which of the following assignment or activity based method (s) do you use to evaluate the students in E-learning \*

\*If OTHERS , specify

*Check all that apply.*

- Prepare questions on a given topic
- Prepare PPT on a given topic
- Arrange the headings in order of importance
- Make an abstract or summary of the topic

Other:  \_\_\_\_\_

*Skip to question 25*

23. Which of the following examination models do you use to evaluate the students in E-learning \*

\*Multiple Responses

*Check all that apply.*

- Subjective (Q & A)
- Objective (MCQ)
- Viva

Other:  \_\_\_\_\_

24. Which of the following assignment or activity based method (s) do you use to evaluate the students in E-learning \*

\*If OTHERS , specify

*Check all that apply.*

- Prepare questions on a given topic
- Prepare PPT on a given topic
- Arrange the headings in order of importance
- Make an abstract or summary of the topic

Other:  \_\_\_\_\_

*Skip to question 25*

25. Whether the evaluation method used in E-learning be used for \*

*Mark only one oval per row.*

|                      | Yes                   | No                    |
|----------------------|-----------------------|-----------------------|
| Formative assessment | <input type="radio"/> | <input type="radio"/> |
| Summative assessment | <input type="radio"/> | <input type="radio"/> |

26. Which problems amongst the following did you face during E-learning sessions \*

*Check all that apply.*

- Network issues
- Knowledge of online platform
- Interaction with students
- Difficulty in conducting practicals
- Lack of controlled environment
- Attentiveness of students
- Not involved in E-learning sessions yet

Other:  \_\_\_\_\_

27. Kindly grade the following individually on the basis of their capacity to affect effective medical education in E-learning

\*

\*0= No Effect ; 5=Max Effect

Mark only one oval per row.

|                                     | 0                     | 1                     | 2                     | 3                     | 4                     | 5                     |
|-------------------------------------|-----------------------|-----------------------|-----------------------|-----------------------|-----------------------|-----------------------|
| Network issues                      | <input type="radio"/> |
| Knowledge of online platform        | <input type="radio"/> |
| Interaction with students           | <input type="radio"/> |
| Difficulty in conducting practicals | <input type="radio"/> |
| Lack of controlled environment      | <input type="radio"/> |
| Attentiveness of students           | <input type="radio"/> |

28. Should the content of practical classes be included in E-learning module \*

Mark only one oval.

Yes

No

Maybe

29. How would you like to conduct and deliver the practical classes content to the students in E-learning \*

\*If OTHERS then specify

*Mark only one oval.*

- Live demonstration
- Pre recorded video with demonstration
- No value if not self performed
- Other: \_\_\_\_\_

30. Would you like to have a feedback mechanism post the E-learning sessions \*

*Mark only one oval.*

- Yes
- No

31. Should E-learning be used as a supplement to conventional Classroom mode of teaching \*

*Mark only one oval.*

- Strongly disagree
- Disagree
- Neutral
- Agree
- Strongly agree

32. How effective do you find E-learning as a mode of pedagogy \*

*Mark only one oval.*

|             |                       |                       |                       |                       |                       |                  |
|-------------|-----------------------|-----------------------|-----------------------|-----------------------|-----------------------|------------------|
|             | 1                     | 2                     | 3                     | 4                     | 5                     |                  |
| Ineffective | <input type="radio"/> | Highly effective |

33. Are you aware about the concept of cyber bullying \*

*Mark only one oval.*

- Yes
- No



34. Have you ever faced cyber bullying \*

*Mark only one oval.*

Yes

No

35. Kindly provide valuable suggestion to improve E-learning

---

---

This content is neither created nor endorsed by Google.

Google Forms

# E-LEARNING THROUGH LEARNERS PERSPECTIVE

---

\* Required

## E-learning in Medical Education

E-learning is the use of web based technology to deliver formalized teaching. With increasing internet penetration, towering number of smart phone users and rising web footprints in India, E-learning as a mode of education has been experiencing a steady growth over the past decade. Medical education in India though has undergone small drifts and evolution in pedagogy over the years, it has been mostly immune to e-learning. During Pandemic, we experienced an exponential application of E-learning pedagogy in order to ensure continuous and effective delivery of medical education and it has become imperative to understand the intricacies, advantages and the challenges posed by E-learning to both the educators and the learners in field of education.

1. Are you willing to Participate in the study? \*

*Mark only one oval.*

Yes

No

2. Do you have any previous exposure towards E-learning? \*

*Mark only one oval.*

Yes

No

3. Is E-learning provided to you by the institution \*

*Mark only one oval.*

Yes

No

4. Are you satisfied with the E-learning provided by your institution \*

*Mark only one oval.*

Yes    *Skip to question 6*

No    *Skip to question 5*

5. What are your reasons for the dissatisfaction \*

\*Multiple Responses

*Check all that apply.*

Lack of adequate interaction

Difficulty in doubt clearance

Absence of classroom environment

Network issues

Health issues

*Skip to question 7*

## 6. What are your reasons for satisfaction \*

\*Multiple Responses

*Check all that apply.*

- Comfortable home environment
- Ease of accessibility
- Convenience of timing
- Shorter sessions

## 7. Which is the most commonly used method by the educators of AIIMS Bhubaneswar \*

AV : AUDIO VISUAL

*Mark only one oval.*

- Live AV with PPT
- Recorded AV with PPT
- Live AV only
- Recorded AV only
- PDF or PPT only

## 8. Grade your following methods on the basis of your preference for using them during E-learning \*

\*1-Minimum 5-Maximum

*Mark only one oval per row.*

|                      | 1                     | 2                     | 3                     | 4                     | 5                     |
|----------------------|-----------------------|-----------------------|-----------------------|-----------------------|-----------------------|
| Live AV with PPT     | <input type="radio"/> |
| Recorded AV with PPT | <input type="radio"/> |
| Live AV only         | <input type="radio"/> |
| Recorded AV only     | <input type="radio"/> |
| PDF or PPT only      | <input type="radio"/> |

## 9. According to you which is the most preferred app for accessing E-learning \*

*Mark only one oval.*

- Google Meet
- Zoom
- Loom
- Webex
- Other: \_\_\_\_\_

10. Which device do you use for accessing E-learning \*

*Check all that apply.*

Smart phone

Laptop

Desktop

Tablet

Other:  \_\_\_\_\_

11. What should be the appropriate duration of a single lecture \*

*Mark only one oval.*

20 min

20-30 min

30-40 min

40-60 min

12. How many hours of E-learning is comfortable for you in one day \*

*Mark only one oval.*

- <1hr    *Skip to question 14*
- 1-2 hr    *Skip to question 14*
- 2- 3 hr    *Skip to question 13*
- 3-4 hr    *Skip to question 13*
- >4 hr, specify    *Skip to question 13*
- Other: \_\_\_\_\_

13. In how many sessions would you like the online classes to be held \*

*Mark only one oval.*

- 1
- 2
- 3

14. Do you want handouts to be provided prior to class \*

*Mark only one oval.*

- Yes
- No
- Maybe

15. Specify the convenient time slot for accessing E-learning \*

*Mark only one oval.*

- 8 am-10 am (Morning)
- 10am-12pm (Forenoon)
- 2pm-4pm (Afternoon)
- Other: \_\_\_\_\_

16. Do you want evaluation of the topics covered \*

*Mark only one oval.*

- Yes    *Skip to question 17*
- No    *Skip to question 22*



17. With which of the following methods do you want to be evaluated \*

*Mark only one oval.*

- Examination based only    *Skip to question 18*
- Activity/Assignment based only    *Skip to question 19*
- Both    *Skip to question 20*

18. What kind of examination model do you want to get evaluated with \*

\*Multiple Responses

*Check all that apply.*

- Subjective (Q & A)
- Objective ( MCQ)
- Viva

Other:  \_\_\_\_\_

*Skip to question 22*

19. Which activity or assignment based method (s) do you want to be used to get evaluated with \*

IF OTHERS, SPECIFY

*Mark only one oval.*

- Prepare question on a given topic
- Prepare PPT on a given topic
- Arrange the headings in the order of importance
- make an abstract/summary of the topic

*Skip to question 22*

20. What kind of examination model do you want to get evaluated with \*

\*Multiple Responses

*Check all that apply.*

- Subjective (Q & A)
- Objective (MCQ)
- Viva

Other:  \_\_\_\_\_

21. What activity or assignment based method (s) do you want to get evaluated with \*

IF OTHERS, SPECIFY

*Mark only one oval.*

- Prepare question paper on a given topic
- Prepare PPT on a given topic
- Arrange the headings in the order of importance
- make an abstract/summary of the topic
- Other

22. How do you want your performance to be assessed \*

*Mark only one oval.*

- Grade based
- Marks based
- Both

23. Would you like to have a feedback mechanism post the E-learning sessions \*

*Mark only one oval.*

- Yes
- No

24. Would you like the practical classes content to be delivered to you \*

*Mark only one oval.*

Yes

No

Maybe

25. How would you like the content of practical classes to be delivered \*

*Mark only one oval.*

Live demonstration

Pre recorded video with demonstration

No use if not self performed

26. Which factors do you miss about classroom teaching \*

\*Multiple Responses

*Check all that apply.*

In person communication

Classroom environment

Peer interaction

Other:  \_\_\_\_\_

27. Should E-learning be used as a supplement to conventional Classroom mode of teaching \*

*Mark only one oval.*

- Strongly disagree
- Disagree
- Neutral
- Agree
- Strongly agree

28. How effective do you found E-learning as a mode of pedagogy \*

*Mark only one oval.*

|             |                       |                       |                       |                       |                       |                  |
|-------------|-----------------------|-----------------------|-----------------------|-----------------------|-----------------------|------------------|
|             | 1                     | 2                     | 3                     | 4                     | 5                     |                  |
| Ineffective | <input type="radio"/> | Highly effective |

29. Kindly provide valuable suggestion to improve E-learning

---

# Google Forms
